# Supplementary material for: Amphiphilic porous polyhedral oligomeric silsesquioxanes (POSS) incorporated polyoxometalate-paired polymeric hybrids: interfacial catalysts for epoxidation reactions
Source: Royal Society of Chemistry journal article supplement (doi:10.1039/c4ra16956e), 2015-01-01
Supplement: c4ra16956e1.pdf [file c4ra16956e1.pdf]

## Electronic Supplementary Information

### Amphiphilic Porous Polyhedral Oligomeric Silsesquioxanes (POSS) Incorporated Polyoxometalate-Paired Polymeric Hybrids: Interfacial Catalysts for Epoxidation Reactions

Yan Leng,<sup>\*a</sup> Jiwei Zhao,<sup>a</sup> Pingping Jiang,<sup>a</sup> and Jun Wang<sup>b</sup>

<sup>a</sup> The Key Laboratory of Food Colloids and Biotechnology, Ministry of Education, School of Chemical and Material Engineering, Jiangnan University, Wuxi 214122, China. Fax: +86-510-85917763; Tel: +86-510-85917090; E-mail: lengyan1114@126.com

<sup>b</sup> State Key Laboratory of Materials-Oriented Chemical Engineering, College of Chemistry and Chemical Engineering, Nanjing Tech University, Nanjing 210009, China.

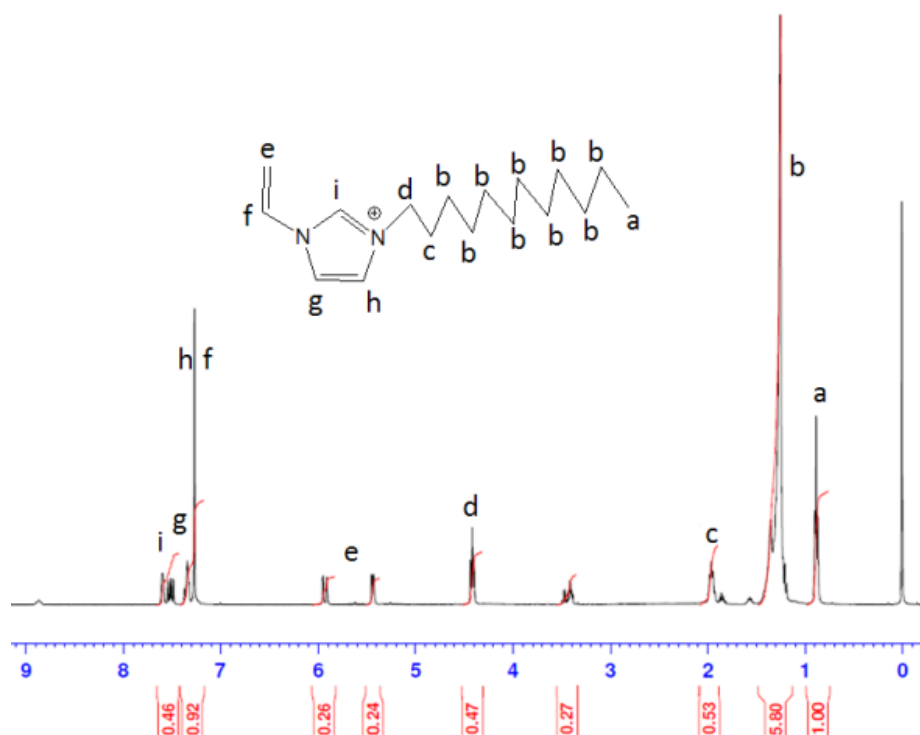

Figure S1. <sup>1</sup>H NMR of DIM.

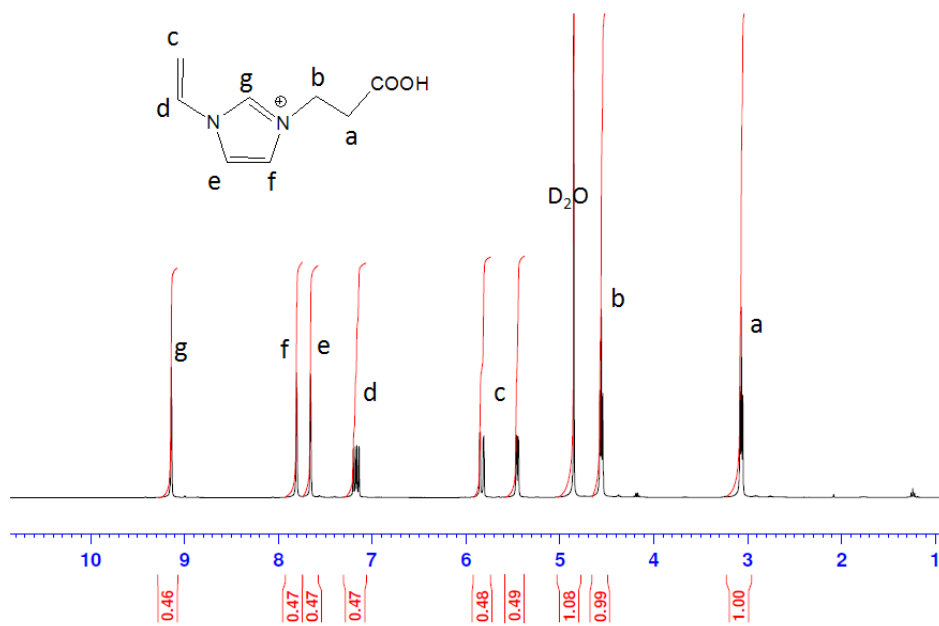

Figure S2. <sup>1</sup>H NMR of CIM

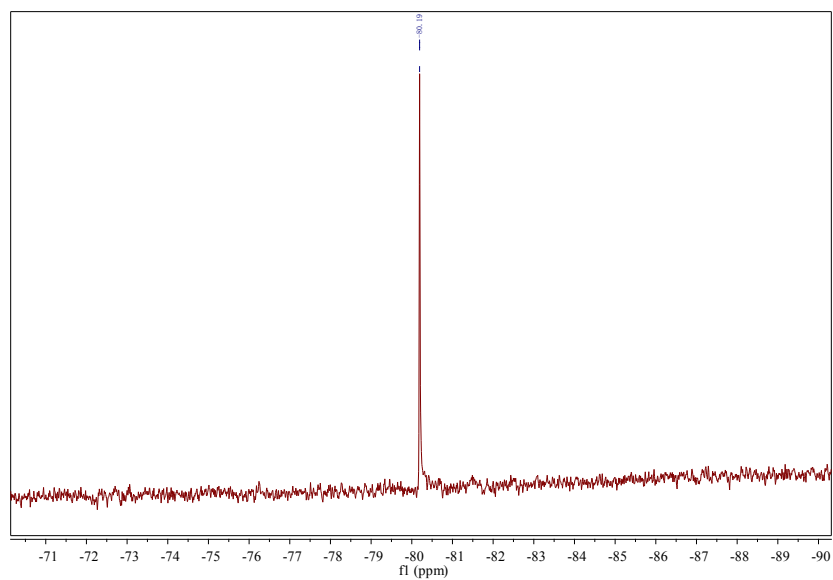

Figure S3. <sup>29</sup>Si NMR of POSS

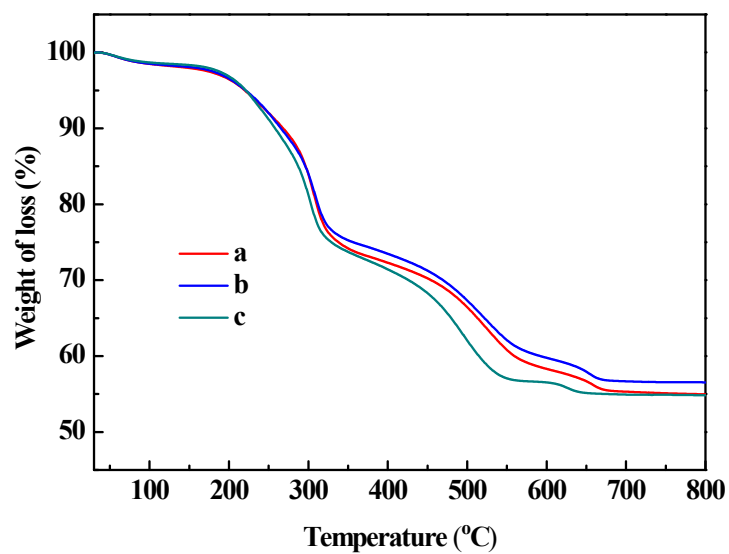

Figure S4. TG curves of (a) POSS-DIM<sub>5</sub>-CIM<sub>5</sub>-PW, (b) POSS-DIM<sub>5</sub>-CIM<sub>3</sub>-PW, and (c) POSS-DIM<sub>8</sub>-CIM<sub>6</sub>-PW.

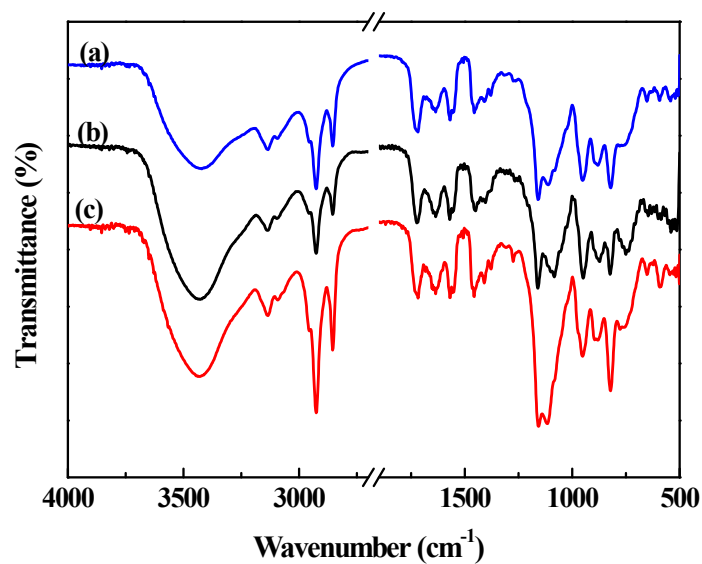

Figure S5. FT-IR spectra of (a) POSS-DIM<sub>5</sub>-CIM<sub>5</sub>-PW, (b) POSS-DIM<sub>5</sub>-CIM<sub>3</sub>-PW, and (c) POSS-DIM<sub>8</sub>-CIM<sub>6</sub>-PW.

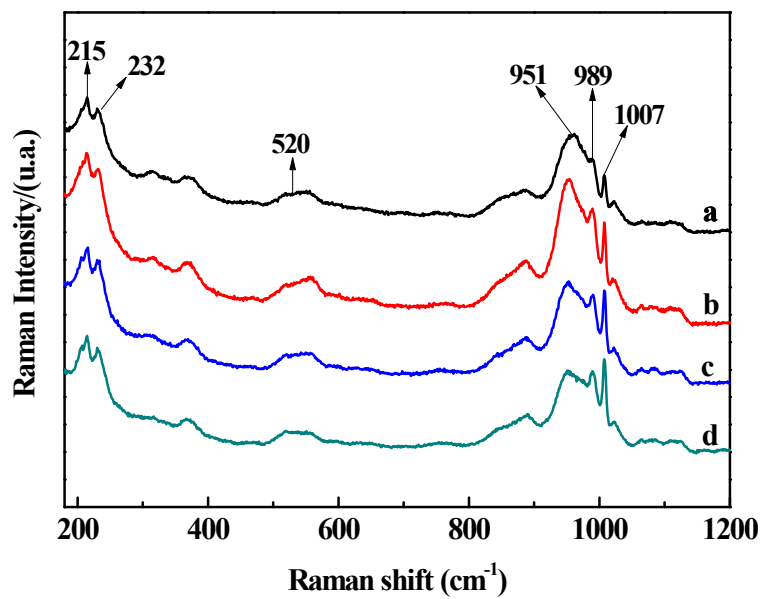

Figure S6. Raman spectra of (a) POSS-DIM<sub>3</sub>-CIM<sub>5</sub>-PW, (b) POSS-DIM<sub>5</sub>-CIM<sub>5</sub>-PW, (c) POSS-DIM<sub>5</sub>-CIM<sub>3</sub>-PW, and (d) POSS-DIM<sub>8</sub>-CIM<sub>6</sub>-PW.
